# Supplementary material
Source: ML conference proceedings conference paper supplement (https://openreview.net/forum?id=Srgg_ULj9gq)

Accuracy (TA or RA)

- TA: Pre-training on ImageNet
- RA: Pre-training on ImageNet
- TA: No Pre-training
- RA: No Pre-training

100

80

60

40

20

0

5

10

15

Fine-tuning epochs

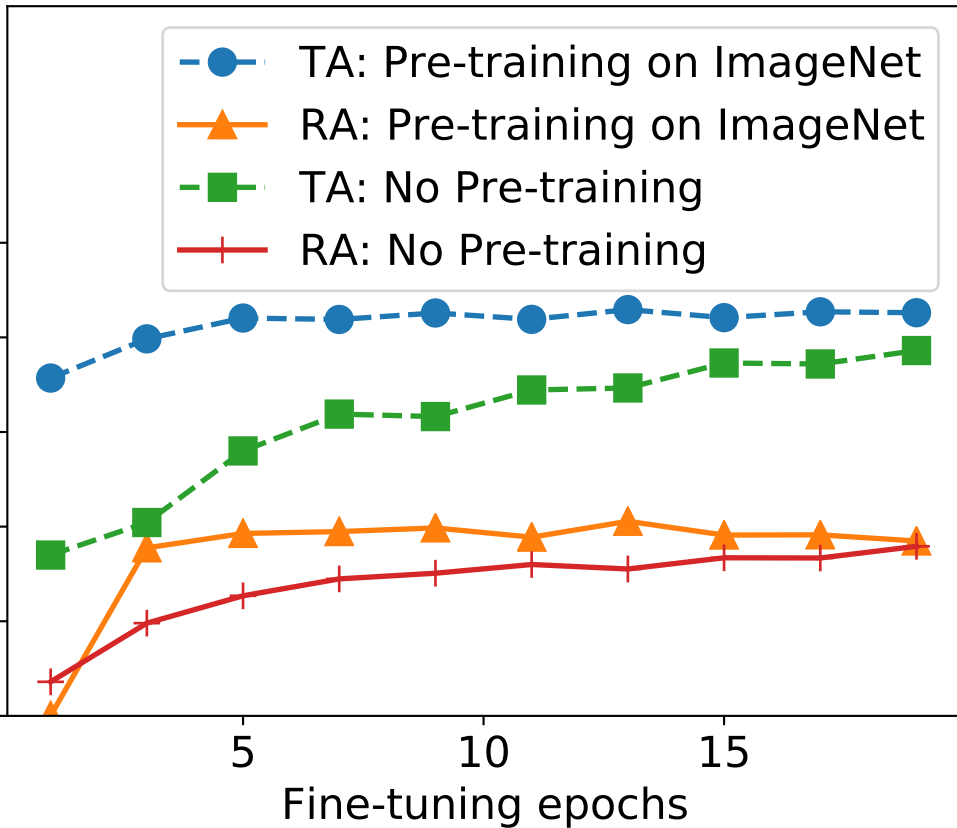

Supplement: supplementary_material [file attachment]
